# Supplementary material for: Improvement of Broad-Spectrum Disease-Resistant Rice by the Overexpression of BSR1 via a Moderate-Strength Constitutive Promoter and a Pathogen-Inducible Promoter
Source: MDPI journal article supplement (doi:10.3390/plants13081138), 2024-04-18
Supplement: s1 [file s1]

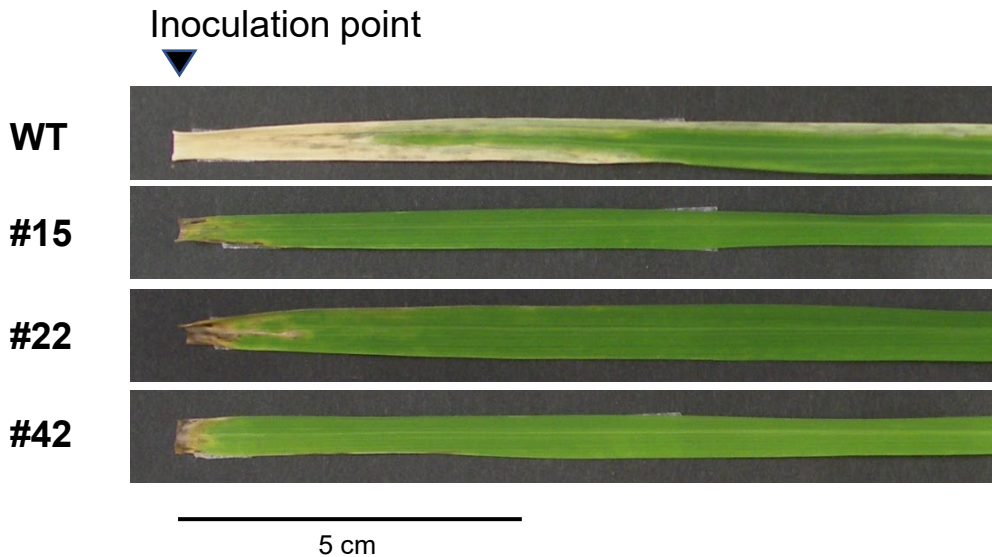

**Figure S1. Disease resistance to *Xanthomonas oryzae* pv. *oryzae* (T7174, race I) in  $P_{OsUbi7}$ -*BSR1* T1 lines.** Top leaves (L6-L8) of  $P_{OsUbi7}$ -*BSR1* and WT lines were inoculated with *X. oryzae* pv. *oryzae* (T7174). The arrowhead indicates the point of inoculation.

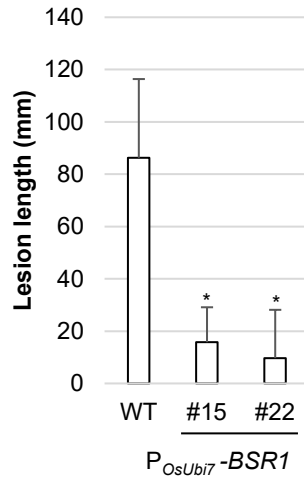

**Figure S2. Disease resistance to *Xanthomonas oryzae* pv. *oryzae* (T7133, race III) in  $P_{OsUbi7}\text{-}BSR1$  T1 lines.** Top leaves (L6-L8) of  $P_{OsUbi7}\text{-}BSR1$  and WT plants were inoculated with *X. oryzae* pv. *oryzae* (T7133). Lesion lengths in  $P_{OsUbi7}\text{-}BSR1$  lines were significantly lower than those in wild-type (WT) plants (\* $P < 0.05$  by Dunnett's test). Values are mean  $\pm$  SD (n = 6-18).

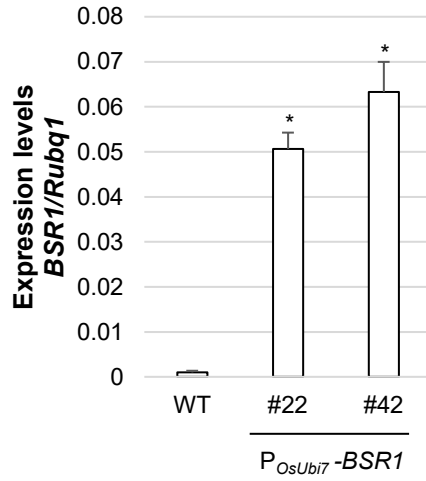

**Figure S3. *BSR1* expression levels in P<sub>OsUbi7</sub>-*BSR1* T4 lines.** *BSR1* expression levels in P<sub>OsUbi7</sub>-*BSR1* lines were significantly higher than those in wild-type (WT) plants (\* $P < 0.05$  by Dunnett's test). Values are mean  $\pm$  SD (n = 3).

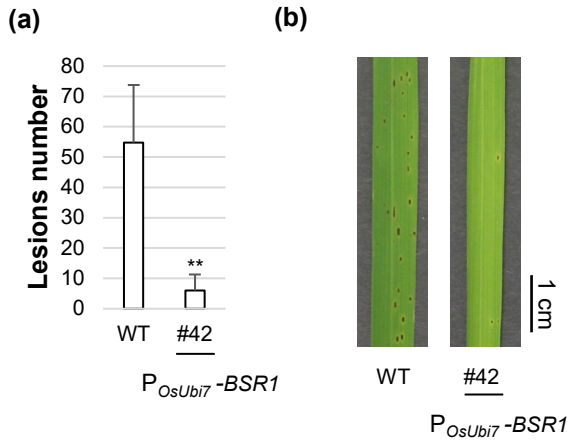

**Figure S4. Disease resistance to *Cochliobolus miyabeanus* in  $P_{OsUbi7}$ -BSR1 T4 line.** (a) Lesion numbers on *C. miyabeanus* infected T4 leaves in  $P_{OsUbi7}$ -BSR1 and WT lines 4 d after inoculation. The inoculum concentration was  $5 \times 10^4$  conidia/ ml. Lesion numbers in  $P_{OsUbi7}$ -BSR1 plants were significantly lower than in WT plants 4 d after inoculation (\*\* $P < 0.01$  by t-test). Values are mean  $\pm$  SD (n = 6-7). (b) Photographs of leaves infected with *C. miyabeanus* in  $P_{OsUbi7}$ -BSR1 and WT lines 4 d after inoculation.

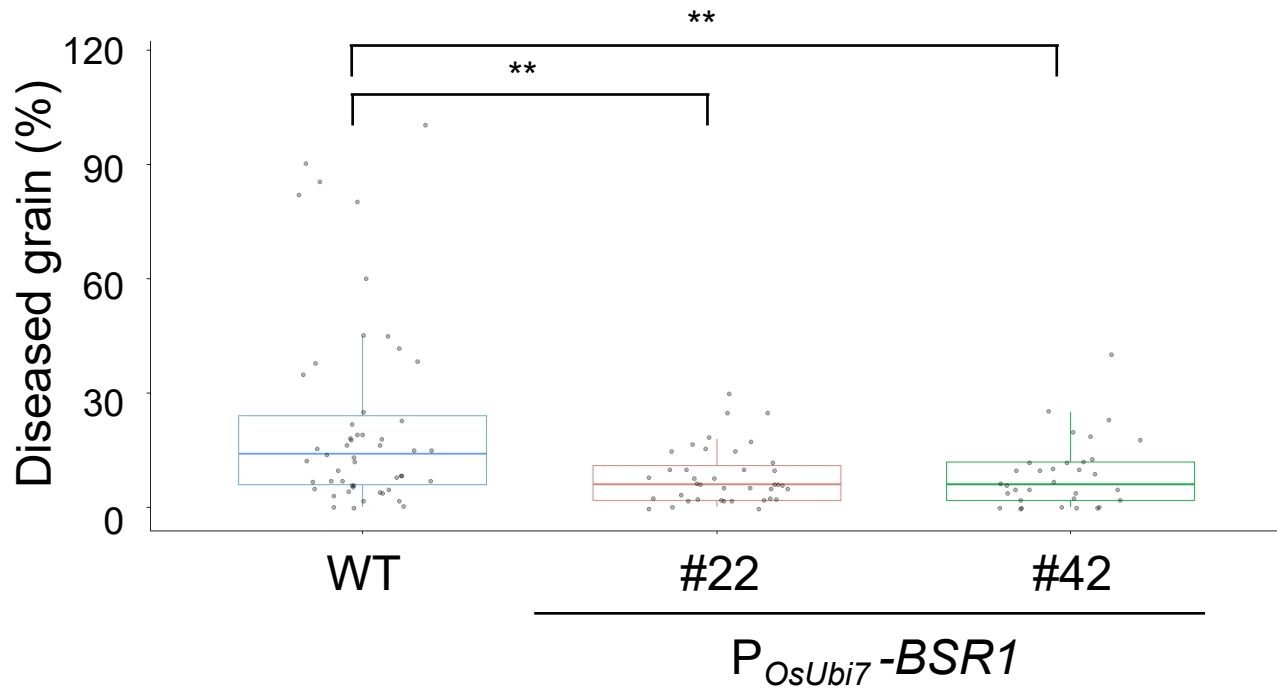

**Figure S5. Disease resistance to panicle blast caused by *Pyricularia oryzae* (isolate Kyu89-246) in the descendants of the  $P_{OsUbi7-BSR1}$  #22 and #42 lines.** Kruskal-Wallis test with Steel's post-hoc test was used to analyze significant differences between these group (\*\* $P < 0.01$ ).

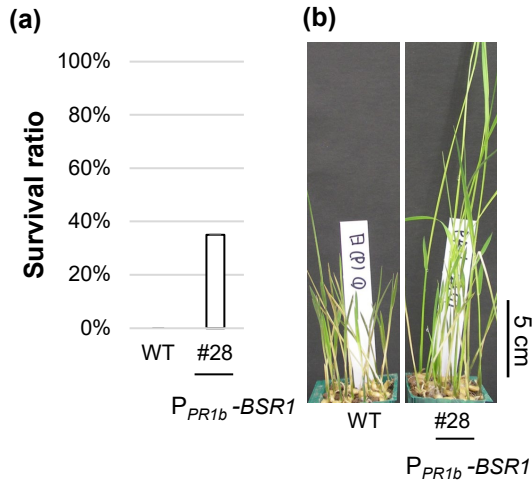

**Figure S6. Disease resistance to *Burkholderia glumae* in P<sub>PR1b</sub>-BSR1 T2 lines.** (a) Pre-germinated T2 seeds of P<sub>PR1b</sub>-BSR1 and wild-type (WT) lines were inoculated with *B. glumae*. The inoculum concentration was OD<sub>520</sub> = 0.0004. Survival ratio was calculated 8 d after inoculation (n = 20). Tests were repeated thrice with similar results. (b) Photographs of *B. glumae* infected shoots in P<sub>PR1b</sub>-BSR1 and WT lines 8 d after inoculation.

### **Method S1. Evaluation of panicle blast resistance**

The young seedlings were transplanted into plastic pots, grown in the glasshouse room of the NARO, and used for inoculation within 10 d from the day when the neck of the panicle emerged. Spores of race 003.0, a blast fungus pathogenic to WT and P<sub>OsUbi7</sub>-*BSRI* lines, were suspended in 0.01% Tween 20 and sprayed with 20 mL per pot at a concentration of  $1.0 \times 10^5$  conidia/ mL; and the plants were kept in a dew chamber for 20 h at 24.5 °C and grown in a glasshouse. The proportions of diseased grains per panicle were examined approximately 3 weeks after inoculation [1, 2]. Statistical analyses were conducted using EZR (Saitama Medical Center, Jichi Medical University, Saitama, Japan), which is a graphical user interface for R [3]. The Kruskal–Wallis test with Steel’s post-hoc test was used to analyze significant differences between these group (\*\* $P < 0.01$ ).

### **References**

1. Hayashi, N.; Inoue, H.; Kato, T.; Funao, T.; Shiota, M.; Shimizu, T.; Kanamori, H.; Yamane, H.; Hayano-Saito, Y.; Matsumoto, T.; Yano, M.; Takatsuji, H., Durable panicle blast-resistance gene Pb1 encodes an atypical CC-NBS-LRR protein and was generated by acquiring a promoter through local genome duplication. *Plant J.* **2010**, 64, (3), 498-510.
2. Inoue, H.; Hayashi, N., The Panicle Blast Resistance Mechanism of in the Rice Cultivar Miyazaki-mochi is Independent from that of. *Jarq-Jpn Agr Res Q* **2019**, 53, (4), 289-293.
3. Kanda, Y., Investigation of the freely available easy-to-use software 'EZR' for medical statistics. *Bone Marrow Transplant.* **2013**, 48, (3), 452-458.
